# Supplementary material
Source: MDPI journal article supplement (https://www.mdpi.com/2071-1050/15/8/6712)
Supplement: s1 [file s1]

# Climate Change, Sustainable Forest Management, ICT Nexus, and the SDG 2030: A Systems Thinking Approach

## Supplementary Materials

Table S1 displays a list of 12 literature sources, their corresponding references, and the number of SDTs aligned to CC, SFM, and ICT. The table highlights the clustering of SDTs and the CSI Nexus domains, as illustrated by the circular relationship diagram in Figure 1. This diagram visually represents the interlinkages among the SDTs and the three groups of data sources identified in the study.

Additionally, the table shows four literature references identified in each of the three domains of the CSI Nexus. Each reference was associated with a specific set of SDTs. The clustering of literature sources connecting SDTs to CC, SFM, and ICT was based on a content analysis of the identified sources.

Table S1. List of Connected SDTs as Data Source Aligned to CC, SFM, and ICT

| CSI Clusters Code                    | Literature References                                                                                                                                                                                                                                                                                                                                   | Connected SDG Targets (SDTs)                                                                                                                                                                                                                                                                                                                                                                                                                                                                                                                                                                                                                                                                                                                                |
|--------------------------------------|---------------------------------------------------------------------------------------------------------------------------------------------------------------------------------------------------------------------------------------------------------------------------------------------------------------------------------------------------------|-------------------------------------------------------------------------------------------------------------------------------------------------------------------------------------------------------------------------------------------------------------------------------------------------------------------------------------------------------------------------------------------------------------------------------------------------------------------------------------------------------------------------------------------------------------------------------------------------------------------------------------------------------------------------------------------------------------------------------------------------------------|
| Climate Change (CC1)                 | Fuso Nerini, F.; Sovacool, B.; Hughes, N.; Cozzi, L.; Cosgrave, E.; Howells, M.; Tavoni, M.; Tomei, J.; Zerriffi, H.; Milligan, B. Connecting climate action with other Sustainable Development Goals. <i>Nature Sustainability</i> 2019, 2, 674–680. <a href="https://doi.org/10.1038/s41893-019-0334-y">https://doi.org/10.1038/s41893-019-0334-y</a> | 1.1, 1.2, 1.3, 1.4, 1.5, 1.b, 2.1, 2.2, 2.3, 2.4, 2.5, 2.c, 3.1, 3.2, 3.3, 3.4, 4.1, 4.2, 4.5, 5.1, 5.2, 5.5, 5.a, 5.b, 5.c, 6.1, 6.2, 6.4, 6.6, 7.1, 7.2, 7.b, 8.1, 8.3, 8.4, 8.5, 8.6, 8.8, 8.9, 8.10, 9.1, 10.1, 10.2, 10.6, 10.7, 11.1, 11.2, 11.5, 12.1, 12.2, 13.1, 13.2, 13.3, 13.a, 13.b, 14.1, 14.2, 14.3, 14.4, 14.7, 14.a, 14.b, 15.1, 15.2, 15.3, 15.4, 15.5, 15.6, 15.8, 15.c, 16.1, 16.7.                                                                                                                                                                                                                                                                                                                                                     |
| Climate Change (CC2)                 | IPCC. Global warming of 1.5 C: An IPCC Special Report on the impacts of global warming of 1.5°C above pre-industrial levels and related global greenhouse gas emission pathways. Available online: <a href="https://bit.ly/3vztl9P">https://bit.ly/3vztl9P</a> (accessed on December 5, 2022)                                                           | 1.1, 1.2, 1.3, 1.4, 1.5, 1.a, 1.b, 2.1, 2.2, 2.3, 2.4, 2.a, 2.b, 2.c, 3.1, 3.2, 3.3, 3.4, 3.6, 3.9, 3.a, 3.c, 4.1, 4.2, 4.3, 4.4, 4.5, 4.7, 4.b, 5.1, 5.4, 5.5, 5.a, 5.b, 6.1, 6.2, 6.3, 6.4, 6.5, 6.6, 7.1, 7.2, 7.3, 7.a, 7.b, 8.1, 8.2, 8.3, 8.4, 8.5, 8.6, 8.7, 8.8, 8.9, 8.10, 8.a, 8.b, 9.1, 9.2, 9.3, 9.4, 9.5, 9.a, 9.b, 10.1, 10.2, 10.3, 10.4, 11.1, 11.2, 11.3, 11.6, 11.7, 11.a, 11.b, 11.c, 12.1, 12.2, 12.3, 12.4, 12.5, 12.6, 12.7, 12.8, 12.a, 12.c, 13.1, 13.2, 13.3, 13.a, 13.b, 14.1, 14.2, 14.3, 14.4, 14.5, 14.7, 15.1, 15.2, 15.3, 15.4, 15.5, 15.8, 15.9, 16.1, 16.3, 16.4, 16.5, 16.6, 16.7, 16.8, 16.a, 17.1, 17.3, 17.4, 17.5, 17.6, 17.7, 17.10, 17.14, 17.17.                                                                   |
| Climate Change (CC3)                 | FAO. Climate-smart agriculture and the Sustainable Development Goals: Mapping interlinkages, synergies and trade-offs and guidelines for integrated implementation. Available online: <a href="https://bit.ly/3vx2Xx7">https://bit.ly/3vx2Xx7</a> (accessed on October 23, 2022).                                                                       | 1.1, 1.2, 1.3, 1.4, 1.5, 1.a, 1.b, 2.1, 2.2, 2.3, 2.4, 2.5, 2.a, 3.1, 3.2, 3.3, 3.4, 3.9, 4.1, 4.2, 4.4, 5.1, 5.4, 5.5, 5.a, 5.b, 6.1, 6.3, 6.4, 6.5, 6.6, 6.a, 7.1, 7.2, 7.3, 8.1, 8.2, 8.3, 8.4, 8.5, 8.6, 8.10, 9.1, 9.3, 9.4, 9.c, 10.1, 10.2, 10.3, 10.4, 10.b, 11.4, 11.5, 11.6, 11.a, 12.2, 12.3, 12.4, 12.5, 12.a, 12.c, 13.1, 13.2, 13.3, 13.a, 13.b, 14.1, 14.2, 14.3, 14.4, 14.5, 14.6, 14.b, 14.c, 15.1, 15.2, 15.3, 15.4, 15.5, 15.6, 15.9, 15.a, 15.b, 16.6, 16.7, 16.b, 17.3, 17.14, 17.17                                                                                                                                                                                                                                                   |
| Climate Change (CC4)                 | Zhou, X., Moinuddin, M., Li, Y., 2019. SDG Interlinkages Analysis & Visualisation Web Tool (V3.0). Hayama: IGES. Available at: <a href="https://sdginterlinkages.iges.jp/visualisationtool.html">https://sdginterlinkages.iges.jp/visualisationtool.html</a>                                                                                            | 1.1, 1.2, 1.3, 1.4, 1.5, 1.a, 1.b, 2.1, 2.2, 2.3, 2.4, 2.5, 2.a, 2.c, 3.2, 3.3, 3.4, 3.6, 3.8, 3.9, 3.b, 3.d, 4.1, 4.2, 4.7, 4.a, 5.1, 5.3, 5.4, 5.5, 5.a, 5.b, 5.c, 6.1, 6.2, 6.3, 6.4, 6.5, 6.6, 6.a, 6.b, 7.1, 7.2, 7.3, 7.a, 7.b, 8.1, 8.2, 8.3, 8.4, 8.5, 8.6, 8.8, 8.9, 8.a, 9.1, 9.2, 9.3, 9.4, 9.5, 9.a, 9.b, 9.c, 10.1, 10.2, 10.3, 10.7, 10.a, 10.b, 11.1, 11.2, 11.3, 11.4, 11.5, 11.6, 11.7, 11.a, 11.b, 11.c, 12.1, 12.2, 12.3, 12.4, 12.5, 12.6, 12.7, 12.8, 12.a, 12.b, 12.c, 13.1, 13.2, 13.3, 13.a, 13.b, 14.1, 14.2, 14.3, 14.4, 14.5, 14.6, 14.7, 14.a, 14.b, 15.1, 15.2, 15.3, 15.4, 15.5, 15.9, 16.5, 16.6, 16.7, 16.8, 16.10, 17.1, 17.2, 17.3, 17.6, 17.7, 17.8, 17.9, 17.11, 17.12, 17.13, 17.14, 17.15, 17.16, 17.17, 17.18, 17.19 |
| Sustainable Forest Management (SFM1) | FAO. 2018. The State of the World's Forests 2018 - Forest Pathways to sustainable development. Rome. License: CC BY-NC-SA 3.0 IGO. Available at <a href="https://www.fao.org/3/I9535EN/I9535en.pdf">https://www.fao.org/3/I9535EN/I9535en.pdf</a>                                                                                                       | 1.1, 1.4, 1.5, 2.1, 2.3, 5.5, 5.a, 6.6, 6.6.1, 7.1, 7.2, 8.3, 8.9, 11.4, 11.7, 12.2, 12.5, 12.6, 12.7, 13.1, 13.2, 13.3, 15.1, 15.1.1, 15.1.2, 15.2, 15.2.1, 15.3, 15.4, 15.4.1, 15.4.2, 15.5, 15.5.1, 15.b                                                                                                                                                                                                                                                                                                                                                                                                                                                                                                                                                 |
| Sustainable Forest Management (SFM2) | OLI-UNFF. Development of a global core set of forest indicators to support the implementation of the 2030 Agenda on Sustainable Development and the IAF Strategic Plan. Available online: <a href="https://bit.ly/3G66RIH">https://bit.ly/3G66RIH</a> (accessed on October 29, 2022) .                                                                  | 2.3, 6.6, 7.1, 7.2, 8.3, 12.5, 13.2, 15.1, 15.2, 15.3, 15.4, 15.5, 15.7, 15.b, 15.c, 17.9, 17.14                                                                                                                                                                                                                                                                                                                                                                                                                                                                                                                                                                                                                                                            |

|                                                 |                                                                                                                                                                                                                                                                                                                                                               |                                                                                                                                                                                                                                                                                                                                                                                                                                                                                                |
|-------------------------------------------------|---------------------------------------------------------------------------------------------------------------------------------------------------------------------------------------------------------------------------------------------------------------------------------------------------------------------------------------------------------------|------------------------------------------------------------------------------------------------------------------------------------------------------------------------------------------------------------------------------------------------------------------------------------------------------------------------------------------------------------------------------------------------------------------------------------------------------------------------------------------------|
| Sustainable Forest Management (SFM3)            | FSC: A tool to implement the sustainable development goals. Revised July 2019 Available at <a href="https://fsc.org/en/media/6272">https://fsc.org/en/media/6272</a>                                                                                                                                                                                          | 1.4, 1.5, 4.3, 4.4, 4.7, 5.1, 5.5, 5.b, 5.c, 6.3, 6.4, 6.5, 6.6, 7.2, 7.3, 7.a, 8.2, 8.3, 8.4, 8.5, 8.8, 9.1, 9.3, 11.1, 11.3, 11.4, 11.6, 12.2, 12.3, 12.4, 12.5, 12.6, 12.7, 12.8, 13.1, 13.2, 13.3, 13.a, 14.1, 15.2, 15.3, 15.5, 15.a, 15.c                                                                                                                                                                                                                                                |
| Sustainable Forest Management (SFM4)            | World business Council for Sustainable Development (WBCSD). Forest Sector SDG (FSG) Roadmap. Available at <a href="https://docs.wbcsd.org/2019/07/WBCSD_Forest_Sector_SDG_Roadmap.pdf">https://docs.wbcsd.org/2019/07/WBCSD_Forest_Sector_SDG_Roadmap.pdf</a>                                                                                                 | 1.4, 1.5, 4.3, 4.4, 4.7, 5.1, 5.5, 5.b, 5.c, 6.3, 6.4, 6.5, 6.6, 7.2, 7.3, 7.a, 8.2, 8.3, 8.4, 8.5, 8.8, 9.1, 9.3, 11.1, 11.3, 11.4, 11.6, 12.2, 12.3, 12.5, 12.6, 12.7, 12.8, 13.1, 13.2, 13.3, 13.a, 15.1, 15.2, 15.3, 15.5, 15.a, 15.b                                                                                                                                                                                                                                                      |
| Information and Communication Technology (ICT1) | Partnership on Measuring ICT for Development, 2019. A thematic list of ICT indicators for the SDG. Available at <a href="https://www.itu.int/en/ITU-D/Statistics/Documents/intlcoop/partnership/Thematic_ICT_indicators_for_the_SDGs.pdf">https://www.itu.int/en/ITU-D/Statistics/Documents/intlcoop/partnership/Thematic_ICT_indicators_for_the_SDGs.pdf</a> | 1.4, 2.3, 2.a, 2.c, 3.8, 4.4, 4.5, 4.a, 5.b, 8.1, 8.2, 8.3, 8.5, 8.10, 9.1, 9.5, 9.a, 9.c, 10.c, 12.4, 12.5, 12.8, 16.6, 16.7, 16.10, 17.6, 17.8                                                                                                                                                                                                                                                                                                                                               |
| Information and Communication Technology (ICT2) | ITU-WSIS, 2015. World Summit on Information Society - Action Lines. Linking WSIS Action Lines with Sustainable Development Goals. Available at <a href="https://www.itu.int/net4/wsis/sdg/Content/Documents/wsis-sdg_matrix_document.pdf">https://www.itu.int/net4/wsis/sdg/Content/Documents/wsis-sdg_matrix_document.pdf</a>                                | 1.4, 1.5, 1.b, 2.3, 2.4, 2.5, 2.a, 3.3, 3.7, 3.8, 3.b, 3.d, 4.1, 4.3, 4.4, 4.5, 4.7, 5.5, 5.6, 5.b, 6.a, 6.b, 7.1, 7.a, 7.b, 8.1, 8.2, 8.3, 8.5, 8.9, 8.10, 9.1, 9.3, 9.4, 9.a, 9.c, 10.2, 10.3, 10.c, 11.3, 11.4, 11.5, 11.6, 11.b, 12.6, 12.7, 12.8, 12.a, 12.b, 13.1, 13.2, 13.3, 13.b, 14.a, Goal 15 (15.1, 15.2, 15.3, 15.4, 15.5, 15.6, 15.7, 15.8, 15.9, 15.a, 15.b, 15.c), 16.2, 16.3, 16.5, 16.6, 16.7, 16.10, 16.a, 16.b, 17.6, 17.8, 17.9, 17.11, 17.14, 17.17, 17.17, 17.18, 17.19 |
| Information and Communication Technology (ICT3) | Huawei, 2018. ICT Sustainable Development Goals Benchmark: Accelerating SDGs through ICT. Available at <a href="https://www.huawei.com/minisite/gci/assets/files/Huawei_2018_SDG_report_en.pdf">https://www.huawei.com/minisite/gci/assets/files/Huawei_2018_SDG_report_en.pdf</a>                                                                            | 3.1, 3.2, 3.3, 3.4, 3.5, 3.6, 3.7, 3.8, 3.9, 3.a, 3.b, 3.c, 3.d, 4.1, 4.2, 4.3, 4.4, 4.5, 4.6, 4.7, 4.a, 4.b, 4.c, 5.1, 5.2, 5.3, 5.4, 5.5, 5.6, 5.a, 5.b, 5.c, 7.1, 7.2, 7.3, 7.a, 7.b, 9.1, 9.2, 9.3, 9.4, 9.5, 9.a, 9.b, 9.c, 11.1, 11.2, 11.3, 11.4, 11.5, 11.6, 11.7, 11.a, 11.b, 11.c.                                                                                                                                                                                                   |
| Information and Communication Technology (ICT4) | The Earth Institute Columbia University & Ericsson, 2017. ICT & SDG: How Information and Communication Technology can Accelerate Action on Sustainable Development Goals. Available at <a href="https://www.ericsson.com/assets/local/news/2016/05/ict-sdg.pdf">https://www.ericsson.com/assets/local/news/2016/05/ict-sdg.pdf</a>                            | 1.4, 3.3, 3.4, 3.7, 3.8, 3.d, 4.1, 4.2, 4.3, 4.4, 4.6, 4.a, 4.b, 5.b, 7.1, 7.2, 7.3, 7.a, 7.b, 8.3, 8.10, 9.3, 9.c, 16.9, 17.6, 17.8, 17.18                                                                                                                                                                                                                                                                                                                                                    |

Table S2 presents an affiliation matrix using binary notation to indicate the relationship between specific SDTs and CSI. The table provides the total number of SDTs aligned with each focal area and clusters the SDTs into four categories based on their interconnections with the focal areas: CC + SFM, SFM + ICT, ICT + CC, and CC + SFM + ICT. In the matrix, a 0 indicates no connection, and a 1 indicates a connection. The Total column for each domain of CC, SFM, and ICT ranges from 1 to 4, representing the total number of SDTs connected to each domain. The CC+SFM+ICT Total column ranges from 1 to 12, meaning the possible number of SDTs associated when all three domains are combined.

Table S2. Affiliation Matrix Mapping of CC, SFM, ICT, SDTs, SDGs, and CSI Nexus Clusters

|                     |          | Climate Change Mitigation and Adaptation (CC) |            |           |                       |            | Sustainable Forest Management (SFM) |                |           |                 |             | Information & Communication Technology (ICT) |            |              |                            |             | CC+SFM+ICT (CSI) Total |     |     |             | CC+SFM+ICT Integration |         |        |         |    |     |     |               |
|---------------------|----------|-----------------------------------------------|------------|-----------|-----------------------|------------|-------------------------------------|----------------|-----------|-----------------|-------------|----------------------------------------------|------------|--------------|----------------------------|-------------|------------------------|-----|-----|-------------|------------------------|---------|--------|---------|----|-----|-----|---------------|
| 17 SDGs             | 169 SDTs | Nerini, F. 2019                               | IPCC, 2019 | FAO, 2019 | Zhou, X. et al., 2021 | Total (CC) | FAO, 2018                           | OLI-UNFF, 2016 | FSC, 2019 | WBCSD-FSG, 2019 | Total (SFM) | PMID, 2019                                   | WSIS, 2015 | Huawei, 2018 | ERICSSON & EICU, 2017 [25] | Total (ICT) | CC                     | SFM | ICT | Total (CSI) | CC+SFM+ICT             | CC +SFM | CC+ICT | SFM+ICT | CC | SFM | ICT | No Connection |
| Goal 1: No Poverty  | 1.1      | 1                                             | 1          | 1         | 1                     | 4          | 1                                   | 0              | 0         | 0               | 1           | 0                                            | 0          | 0            | 0                          | 0           | 4                      | 1   | 0   | 5           | 0                      | 1       | 0      | 0       | 0  | 0   | 0   | 0             |
|                     | 1.2      | 1                                             | 1          | 1         | 1                     | 4          | 0                                   | 0              | 0         | 0               | 0           | 0                                            | 0          | 0            | 0                          | 0           | 4                      | 0   | 0   | 4           | 0                      | 0       | 0      | 0       | 1  | 0   | 0   | 0             |
|                     | 1.3      | 1                                             | 1          | 1         | 1                     | 4          | 0                                   | 0              | 0         | 0               | 0           | 0                                            | 0          | 0            | 0                          | 0           | 4                      | 0   | 0   | 4           | 0                      | 0       | 0      | 0       | 1  | 0   | 0   | 0             |
|                     | 1.4      | 1                                             | 1          | 1         | 1                     | 4          | 1                                   | 0              | 0         | 1               | 2           | 1                                            | 1          | 0            | 1                          | 3           | 4                      | 2   | 3   | 9           | 1                      | 0       | 0      | 0       | 0  | 0   | 0   | 0             |
|                     | 1.5      | 1                                             | 1          | 1         | 1                     | 4          | 1                                   | 0              | 1         | 1               | 3           | 0                                            | 1          | 0            | 0                          | 1           | 4                      | 3   | 1   | 8           | 1                      | 0       | 0      | 0       | 0  | 0   | 0   | 0             |
|                     | 1.a      | 0                                             | 1          | 1         | 1                     | 3          | 0                                   | 0              | 0         | 0               | 0           | 0                                            | 0          | 0            | 0                          | 0           | 3                      | 0   | 0   | 3           | 0                      | 0       | 0      | 0       | 1  | 0   | 0   | 0             |
|                     | 1.b      | 1                                             | 1          | 1         | 1                     | 4          | 0                                   | 0              | 0         | 0               | 0           | 0                                            | 1          | 0            | 0                          | 1           | 4                      | 0   | 1   | 5           | 0                      | 0       | 1      | 0       | 0  | 0   | 0   | 0             |
| Goal 2: Zero Hunger | 2.1      | 1                                             | 1          | 1         | 1                     | 4          | 1                                   | 0              | 0         | 0               | 1           | 0                                            | 0          | 0            | 0                          | 0           | 4                      | 1   | 0   | 5           | 0                      | 1       | 0      | 0       | 0  | 0   | 0   | 0             |
|                     | 2.2      | 1                                             | 1          | 1         | 1                     | 4          | 0                                   | 0              | 0         | 0               | 0           | 0                                            | 0          | 0            | 0                          | 0           | 4                      | 0   | 0   | 4           | 0                      | 0       | 0      | 0       | 1  | 0   | 0   | 0             |

|                                            |                              |     |   |   |   |   |   |   |   |   |   |   |   |   |   |   |   |   |   |    |   |   |   |   |   |   |   |   |   |
|--------------------------------------------|------------------------------|-----|---|---|---|---|---|---|---|---|---|---|---|---|---|---|---|---|---|----|---|---|---|---|---|---|---|---|---|
|                                            | 2.3                          | 1   | 1 | 1 | 1 | 4 | 1 | 1 | 0 | 0 | 2 | 1 | 1 | 0 | 0 | 2 | 4 | 2 | 2 | 8  | 1 | 0 | 0 | 0 | 0 | 0 | 0 | 0 |   |
|                                            | 2.4                          | 1   | 1 | 1 | 1 | 4 | 0 | 0 | 1 | 0 | 1 | 0 | 1 | 0 | 0 | 1 | 4 | 1 | 1 | 6  | 1 | 0 | 0 | 0 | 0 | 0 | 0 | 0 |   |
|                                            | 2.5                          | 1   | 0 | 1 | 1 | 3 | 0 | 0 | 0 | 0 | 0 | 0 | 1 | 0 | 0 | 1 | 3 | 0 | 1 | 4  | 0 | 0 | 1 | 0 | 0 | 0 | 0 | 0 |   |
|                                            | 2.a                          | 0   | 1 | 1 | 1 | 3 | 0 | 0 | 0 | 0 | 0 | 1 | 1 | 0 | 0 | 2 | 3 | 0 | 2 | 5  | 0 | 0 | 1 | 0 | 0 | 0 | 0 | 0 |   |
|                                            | 2.b                          | 0   | 1 | 0 | 0 | 1 | 0 | 0 | 0 | 0 | 0 | 0 | 0 | 0 | 0 | 0 | 1 | 0 | 0 | 1  | 0 | 0 | 0 | 0 | 1 | 0 | 0 | 0 |   |
|                                            | 2.c                          | 1   | 1 | 0 | 1 | 3 | 0 | 0 | 0 | 0 | 0 | 1 | 0 | 0 | 0 | 1 | 3 | 0 | 1 | 4  | 0 | 0 | 1 | 0 | 0 | 0 | 0 | 0 |   |
| Goal 3:<br>Good Health and Well Being      | 3.1                          | 1   | 1 | 1 | 0 | 3 | 0 | 0 | 0 | 0 | 0 | 0 | 1 | 0 | 1 | 3 | 0 | 1 | 4 | 0  | 0 | 1 | 0 | 0 | 0 | 0 | 0 | 0 |   |
|                                            | 3.2                          | 1   | 1 | 1 | 1 | 4 | 0 | 0 | 0 | 0 | 0 | 0 | 1 | 0 | 1 | 4 | 0 | 1 | 5 | 0  | 0 | 1 | 0 | 0 | 0 | 0 | 0 | 0 |   |
|                                            | 3.3                          | 1   | 1 | 1 | 1 | 4 | 0 | 0 | 1 | 0 | 1 | 0 | 1 | 1 | 1 | 3 | 4 | 1 | 3 | 8  | 1 | 0 | 0 | 0 | 0 | 0 | 0 | 0 |   |
|                                            | 3.4                          | 1   | 1 | 1 | 1 | 4 | 0 | 0 | 0 | 0 | 0 | 0 | 1 | 1 | 2 | 4 | 0 | 2 | 6 | 0  | 0 | 1 | 0 | 0 | 0 | 0 | 0 | 0 |   |
|                                            | 3.5                          | 0   | 0 | 0 | 0 | 0 | 0 | 0 | 0 | 0 | 0 | 0 | 1 | 0 | 1 | 0 | 0 | 1 | 1 | 0  | 0 | 0 | 0 | 0 | 0 | 1 | 0 |   |   |
|                                            | 3.6                          | 0   | 1 | 0 | 1 | 2 | 0 | 0 | 0 | 0 | 0 | 0 | 0 | 1 | 0 | 1 | 2 | 0 | 1 | 3  | 0 | 0 | 1 | 0 | 0 | 0 | 0 | 0 |   |
|                                            | 3.7                          | 0   | 0 | 0 | 0 | 0 | 0 | 0 | 0 | 0 | 0 | 0 | 1 | 1 | 1 | 3 | 0 | 0 | 3 | 3  | 0 | 0 | 0 | 0 | 0 | 0 | 1 | 0 |   |
|                                            | 3.8                          | 0   | 0 | 0 | 1 | 1 | 0 | 0 | 1 | 0 | 1 | 1 | 1 | 1 | 1 | 4 | 1 | 1 | 4 | 6  | 1 | 0 | 0 | 0 | 0 | 0 | 0 | 0 |   |
|                                            | 3.9                          | 0   | 1 | 1 | 1 | 3 | 0 | 0 | 1 | 0 | 1 | 0 | 0 | 1 | 0 | 1 | 3 | 1 | 1 | 5  | 1 | 0 | 0 | 0 | 0 | 0 | 0 | 0 | 0 |
|                                            | 3.a                          | 0   | 1 | 0 | 0 | 1 | 0 | 0 | 0 | 0 | 0 | 0 | 1 | 0 | 1 | 1 | 0 | 1 | 2 | 0  | 0 | 1 | 0 | 0 | 0 | 0 | 0 | 0 | 0 |
|                                            | 3.b                          | 0   | 0 | 0 | 1 | 1 | 0 | 0 | 0 | 0 | 0 | 0 | 1 | 1 | 0 | 2 | 1 | 0 | 2 | 3  | 0 | 0 | 1 | 0 | 0 | 0 | 0 | 0 | 0 |
|                                            | 3.c                          | 0   | 1 | 0 | 0 | 1 | 0 | 0 | 0 | 0 | 0 | 0 | 1 | 0 | 1 | 1 | 0 | 1 | 2 | 0  | 0 | 1 | 0 | 0 | 0 | 0 | 0 | 0 | 0 |
|                                            | 3.d                          | 0   | 0 | 0 | 1 | 1 | 0 | 0 | 0 | 0 | 0 | 0 | 1 | 1 | 1 | 3 | 1 | 0 | 3 | 4  | 0 | 0 | 1 | 0 | 0 | 0 | 0 | 0 | 0 |
|                                            | Goal 4:<br>Quality Education | 4.1 | 1 | 1 | 1 | 1 | 4 | 0 | 0 | 1 | 0 | 1 | 0 | 1 | 1 | 1 | 3 | 4 | 1 | 3  | 8 | 1 | 0 | 0 | 0 | 0 | 0 | 0 | 0 |
| 4.2                                        |                              | 1   | 1 | 1 | 1 | 4 | 0 | 0 | 0 | 0 | 0 | 0 | 1 | 1 | 2 | 4 | 0 | 2 | 6 | 0  | 0 | 1 | 0 | 0 | 0 | 0 | 0 | 0 |   |
| 4.3                                        |                              | 0   | 1 | 0 | 0 | 1 | 0 | 0 | 0 | 1 | 1 | 0 | 1 | 1 | 1 | 3 | 1 | 1 | 3 | 5  | 1 | 0 | 0 | 0 | 0 | 0 | 0 | 0 |   |
| 4.4                                        |                              | 0   | 1 | 1 | 0 | 2 | 0 | 0 | 0 | 1 | 1 | 1 | 1 | 1 | 1 | 4 | 2 | 1 | 4 | 7  | 1 | 0 | 0 | 0 | 0 | 0 | 0 | 0 |   |
| 4.5                                        |                              | 1   | 1 | 0 | 0 | 2 | 0 | 0 | 0 | 0 | 0 | 1 | 1 | 1 | 0 | 3 | 2 | 0 | 3 | 5  | 0 | 0 | 1 | 0 | 0 | 0 | 0 | 0 |   |
| 4.6                                        |                              | 0   | 0 | 0 | 0 | 0 | 0 | 0 | 0 | 0 | 0 | 0 | 1 | 1 | 2 | 0 | 0 | 2 | 2 | 0  | 0 | 0 | 0 | 0 | 0 | 0 | 1 | 0 |   |
| 4.7                                        |                              | 0   | 1 | 0 | 1 | 2 | 0 | 0 | 0 | 1 | 1 | 0 | 1 | 1 | 0 | 2 | 2 | 1 | 2 | 5  | 1 | 0 | 0 | 0 | 0 | 0 | 0 | 0 |   |
| 4.a                                        |                              | 0   | 0 | 0 | 1 | 1 | 0 | 0 | 0 | 0 | 0 | 1 | 0 | 1 | 1 | 3 | 1 | 0 | 3 | 4  | 0 | 0 | 1 | 0 | 0 | 0 | 0 | 0 |   |
| 4.b                                        |                              | 0   | 1 | 0 | 0 | 1 | 0 | 0 | 0 | 0 | 0 | 0 | 0 | 1 | 1 | 2 | 1 | 0 | 2 | 3  | 0 | 0 | 1 | 0 | 0 | 0 | 0 | 0 |   |
| 4.c                                        | 0                            | 0   | 0 | 0 | 0 | 0 | 0 | 0 | 0 | 0 | 0 | 1 | 0 | 1 | 0 | 0 | 1 | 1 | 0 | 0  | 0 | 0 | 0 | 0 | 0 | 1 | 0 |   |   |
| Goal 5:<br>Gender Equality                 | 5.1                          | 1   | 1 | 1 | 1 | 4 | 0 | 0 | 0 | 1 | 1 | 0 | 0 | 1 | 0 | 1 | 4 | 1 | 1 | 6  | 1 | 0 | 0 | 0 | 0 | 0 | 0 | 0 |   |
|                                            | 5.2                          | 1   | 0 | 0 | 0 | 1 | 0 | 0 | 0 | 0 | 0 | 0 | 1 | 0 | 1 | 1 | 0 | 1 | 2 | 0  | 0 | 1 | 0 | 0 | 0 | 0 | 0 | 0 |   |
|                                            | 5.3                          | 0   | 0 | 0 | 1 | 1 | 0 | 0 | 0 | 0 | 0 | 0 | 1 | 0 | 1 | 1 | 0 | 1 | 2 | 0  | 0 | 1 | 0 | 0 | 0 | 0 | 0 | 0 |   |
|                                            | 5.4                          | 0   | 1 | 1 | 1 | 3 | 0 | 0 | 0 | 0 | 0 | 0 | 1 | 0 | 1 | 3 | 0 | 1 | 4 | 0  | 0 | 1 | 0 | 0 | 0 | 0 | 0 | 0 |   |
|                                            | 5.5                          | 1   | 1 | 1 | 1 | 4 | 1 | 0 | 1 | 1 | 3 | 0 | 1 | 1 | 0 | 2 | 4 | 3 | 2 | 9  | 1 | 0 | 0 | 0 | 0 | 0 | 0 | 0 |   |
|                                            | 5.6                          | 0   | 0 | 0 | 0 | 0 | 0 | 0 | 0 | 0 | 0 | 0 | 1 | 1 | 0 | 2 | 0 | 0 | 2 | 2  | 0 | 0 | 0 | 0 | 0 | 0 | 1 | 0 |   |
|                                            | 5.a                          | 1   | 1 | 1 | 1 | 4 | 1 | 0 | 1 | 0 | 2 | 0 | 0 | 1 | 0 | 1 | 4 | 2 | 1 | 7  | 1 | 0 | 0 | 0 | 0 | 0 | 0 | 0 |   |
|                                            | 5.b                          | 1   | 1 | 1 | 1 | 4 | 0 | 0 | 0 | 1 | 1 | 1 | 1 | 1 | 1 | 4 | 4 | 1 | 4 | 9  | 1 | 0 | 0 | 0 | 0 | 0 | 0 | 0 | 0 |
|                                            | 5.c                          | 1   | 0 | 0 | 1 | 2 | 0 | 0 | 0 | 1 | 1 | 0 | 0 | 1 | 0 | 1 | 2 | 1 | 1 | 4  | 1 | 0 | 0 | 0 | 0 | 0 | 0 | 0 | 0 |
| Goal 6:<br>Clean Water and Sanitation      | 6.1                          | 1   | 1 | 1 | 1 | 4 | 0 | 0 | 0 | 0 | 0 | 0 | 0 | 0 | 0 | 0 | 4 | 0 | 0 | 4  | 0 | 0 | 0 | 0 | 1 | 0 | 0 | 0 |   |
|                                            | 6.2                          | 1   | 1 | 0 | 1 | 3 | 0 | 0 | 0 | 0 | 0 | 0 | 0 | 0 | 0 | 0 | 3 | 0 | 0 | 3  | 0 | 0 | 0 | 0 | 1 | 0 | 0 | 0 |   |
|                                            | 6.3                          | 0   | 1 | 1 | 1 | 3 | 0 | 0 | 0 | 1 | 1 | 0 | 0 | 0 | 0 | 0 | 3 | 1 | 0 | 4  | 0 | 1 | 0 | 0 | 0 | 0 | 0 | 0 |   |
|                                            | 6.4                          | 1   | 1 | 1 | 1 | 4 | 0 | 0 | 1 | 1 | 2 | 0 | 0 | 0 | 0 | 0 | 4 | 2 | 0 | 6  | 0 | 1 | 0 | 0 | 0 | 0 | 0 | 0 |   |
|                                            | 6.5                          | 0   | 1 | 1 | 1 | 3 | 0 | 0 | 1 | 1 | 2 | 0 | 0 | 0 | 0 | 0 | 3 | 2 | 0 | 5  | 0 | 1 | 0 | 0 | 0 | 0 | 0 | 0 |   |
|                                            | 6.6                          | 1   | 1 | 1 | 1 | 4 | 1 | 1 | 1 | 1 | 4 | 0 | 0 | 0 | 0 | 0 | 4 | 4 | 0 | 8  | 0 | 1 | 0 | 0 | 0 | 0 | 0 | 0 |   |
|                                            | 6.a                          | 0   | 0 | 1 | 1 | 2 | 0 | 0 | 0 | 0 | 0 | 0 | 1 | 0 | 0 | 1 | 2 | 0 | 1 | 3  | 0 | 0 | 1 | 0 | 0 | 0 | 0 | 0 |   |
|                                            | 6.b                          | 0   | 0 | 0 | 1 | 1 | 0 | 0 | 0 | 0 | 0 | 0 | 1 | 0 | 0 | 1 | 1 | 0 | 1 | 2  | 0 | 0 | 1 | 0 | 0 | 0 | 0 | 0 |   |
| Goal 7:<br>Affordable and Clean Energy     | 7.1                          | 1   | 1 | 1 | 1 | 4 | 1 | 1 | 0 | 0 | 2 | 0 | 1 | 1 | 1 | 3 | 4 | 2 | 3 | 9  | 1 | 0 | 0 | 0 | 0 | 0 | 0 | 0 |   |
|                                            | 7.2                          | 1   | 1 | 1 | 1 | 4 | 1 | 1 | 1 | 1 | 4 | 0 | 0 | 1 | 1 | 2 | 4 | 4 | 2 | 10 | 1 | 0 | 0 | 0 | 0 | 0 | 0 | 0 |   |
|                                            | 7.3                          | 0   | 1 | 1 | 1 | 3 | 0 | 0 | 0 | 1 | 1 | 0 | 0 | 1 | 1 | 2 | 3 | 1 | 2 | 6  | 1 | 0 | 0 | 0 | 0 | 0 | 0 | 0 |   |
|                                            | 7.a                          | 0   | 1 | 0 | 1 | 2 | 0 | 0 | 0 | 1 | 1 | 0 | 1 | 1 | 1 | 3 | 2 | 1 | 3 | 6  | 1 | 0 | 0 | 0 | 0 | 0 | 0 | 0 |   |
|                                            | 7.b                          | 1   | 1 | 0 | 1 | 3 | 0 | 0 | 0 | 0 | 0 | 0 | 1 | 1 | 1 | 3 | 3 | 0 | 3 | 6  | 0 | 0 | 1 | 0 | 0 | 0 | 0 | 0 |   |
|                                            | 7.c                          | 1   | 1 | 1 | 1 | 4 | 0 | 0 | 0 | 0 | 0 | 1 | 1 | 0 | 0 | 2 | 4 | 0 | 2 | 6  | 0 | 0 | 1 | 0 | 0 | 0 | 0 | 0 |   |
| Goal 8:<br>Decent Work and Economic Growth | 8.1                          | 1   | 1 | 1 | 1 | 4 | 0 | 0 | 0 | 0 | 0 | 1 | 1 | 0 | 0 | 2 | 4 | 0 | 2 | 6  | 0 | 0 | 1 | 0 | 0 | 0 | 0 | 0 |   |
|                                            | 8.2                          | 0   | 1 | 1 | 1 | 3 | 0 | 0 | 0 | 1 | 1 | 1 | 1 | 0 | 0 | 2 | 3 | 1 | 2 | 6  | 1 | 0 | 0 | 0 | 0 | 0 | 0 | 0 |   |
|                                            | 8.3                          | 1   | 1 | 1 | 1 | 4 | 1 | 1 | 0 | 1 | 3 | 1 | 1 | 0 | 1 | 3 | 4 | 3 | 3 | 10 | 1 | 0 | 0 | 0 | 0 | 0 | 0 | 0 |   |
|                                            | 8.4                          | 1   | 1 | 1 | 1 |   |   |   |   |   |   |   |   |   |   |   |   |   |   |    |   |   |   |   |   |   |   |   |   |



|                                              |  |       |   |   |   |   |   |   |   |   |   |   |   |   |   |   |   |   |   |   |   |   |   |   |   |   |   |   |   |
|----------------------------------------------|--|-------|---|---|---|---|---|---|---|---|---|---|---|---|---|---|---|---|---|---|---|---|---|---|---|---|---|---|---|
|                                              |  | 16.10 | 0 | 0 | 0 | 1 | 1 | 0 | 0 | 0 | 0 | 0 | 1 | 1 | 0 | 0 | 2 | 1 | 0 | 2 | 3 | 0 | 0 | 1 | 0 | 0 | 0 | 0 | 0 |
|                                              |  | 16.a  | 0 | 1 | 0 | 0 | 1 | 0 | 0 | 0 | 0 | 0 | 0 | 1 | 0 | 0 | 1 | 1 | 0 | 1 | 2 | 0 | 0 | 1 | 0 | 0 | 0 | 0 | 0 |
|                                              |  | 16.b  | 0 | 0 | 1 | 0 | 1 | 0 | 0 | 0 | 0 | 0 | 0 | 1 | 0 | 0 | 1 | 1 | 0 | 1 | 2 | 0 | 0 | 1 | 0 | 0 | 0 | 0 | 0 |
| Goal 17:<br>Partnerships<br>and the<br>Goals |  | 17.1  | 0 | 1 | 0 | 1 | 2 | 0 | 0 | 1 | 0 | 1 | 0 | 0 | 0 | 0 | 2 | 1 | 0 | 3 | 0 | 1 | 0 | 0 | 0 | 0 | 0 | 0 | 0 |
|                                              |  | 17.2  | 0 | 0 | 0 | 1 | 1 | 0 | 0 | 0 | 0 | 0 | 0 | 0 | 0 | 0 | 1 | 0 | 0 | 1 | 0 | 0 | 0 | 0 | 1 | 0 | 0 | 0 |   |
|                                              |  | 17.3  | 0 | 1 | 1 | 1 | 3 | 0 | 0 | 0 | 0 | 0 | 0 | 0 | 0 | 0 | 3 | 0 | 0 | 3 | 0 | 0 | 0 | 0 | 1 | 0 | 0 | 0 |   |
|                                              |  | 17.4  | 0 | 1 | 0 | 0 | 1 | 0 | 0 | 0 | 0 | 0 | 0 | 0 | 0 | 0 | 1 | 0 | 0 | 1 | 0 | 0 | 0 | 0 | 1 | 0 | 0 | 0 |   |
|                                              |  | 17.5  | 0 | 1 | 0 | 0 | 1 | 0 | 0 | 0 | 0 | 0 | 0 | 0 | 0 | 0 | 1 | 0 | 0 | 1 | 0 | 0 | 0 | 0 | 1 | 0 | 0 | 0 |   |
|                                              |  | 17.6  | 0 | 1 | 0 | 1 | 2 | 0 | 0 | 0 | 0 | 0 | 1 | 1 | 0 | 1 | 3 | 2 | 0 | 3 | 5 | 0 | 0 | 1 | 0 | 0 | 0 | 0 | 0 |
|                                              |  | 17.7  | 0 | 1 | 0 | 1 | 2 | 0 | 0 | 0 | 0 | 0 | 0 | 0 | 0 | 0 | 2 | 0 | 0 | 2 | 0 | 0 | 0 | 0 | 1 | 0 | 0 | 0 |   |
|                                              |  | 17.8  | 0 | 0 | 0 | 1 | 1 | 0 | 0 | 0 | 0 | 0 | 1 | 1 | 0 | 1 | 3 | 1 | 0 | 3 | 4 | 0 | 0 | 1 | 0 | 0 | 0 | 0 | 0 |
|                                              |  | 17.9  | 0 | 0 | 0 | 1 | 1 | 0 | 1 | 0 | 0 | 1 | 0 | 1 | 0 | 0 | 1 | 1 | 1 | 1 | 3 | 1 | 0 | 0 | 0 | 0 | 0 | 0 | 0 |
|                                              |  | 17.10 | 0 | 1 | 0 | 0 | 1 | 0 | 0 | 0 | 0 | 0 | 0 | 0 | 0 | 0 | 1 | 0 | 0 | 1 | 0 | 0 | 0 | 0 | 1 | 0 | 0 | 0 |   |
|                                              |  | 17.11 | 0 | 0 | 0 | 1 | 1 | 0 | 0 | 1 | 0 | 1 | 0 | 1 | 0 | 0 | 1 | 1 | 1 | 1 | 3 | 1 | 0 | 0 | 0 | 0 | 0 | 0 | 0 |
|                                              |  | 17.12 | 0 | 0 | 0 | 1 | 1 | 0 | 0 | 0 | 0 | 0 | 0 | 0 | 0 | 0 | 1 | 0 | 0 | 1 | 0 | 0 | 0 | 0 | 1 | 0 | 0 | 0 |   |
|                                              |  | 17.13 | 0 | 0 | 0 | 1 | 1 | 0 | 0 | 0 | 0 | 0 | 0 | 0 | 0 | 0 | 1 | 0 | 0 | 1 | 0 | 0 | 0 | 0 | 1 | 0 | 0 | 0 |   |
|                                              |  | 17.14 | 0 | 1 | 1 | 1 | 3 | 0 | 1 | 0 | 0 | 1 | 0 | 1 | 0 | 0 | 1 | 3 | 1 | 1 | 5 | 1 | 0 | 0 | 0 | 0 | 0 | 0 | 0 |
|                                              |  | 17.15 | 0 | 0 | 0 | 1 | 1 | 0 | 0 | 0 | 0 | 0 | 0 | 0 | 0 | 0 | 1 | 0 | 0 | 1 | 0 | 0 | 0 | 0 | 1 | 0 | 0 | 0 |   |
|                                              |  | 17.16 | 0 | 0 | 0 | 1 | 1 | 0 | 0 | 0 | 0 | 0 | 0 | 1 | 0 | 0 | 1 | 1 | 0 | 1 | 2 | 0 | 0 | 1 | 0 | 0 | 0 | 0 | 0 |
|                                              |  | 17.17 | 0 | 1 | 1 | 1 | 3 | 0 | 0 | 1 | 0 | 1 | 0 | 1 | 0 | 0 | 1 | 3 | 1 | 1 | 5 | 1 | 0 | 0 | 0 | 0 | 0 | 0 | 0 |
|                                              |  | 17.18 | 0 | 0 | 0 | 1 | 1 | 0 | 0 | 0 | 0 | 0 | 0 | 1 | 0 | 1 | 2 | 1 | 0 | 2 | 3 | 0 | 0 | 1 | 0 | 0 | 0 | 0 | 0 |
|                                              |  | 17.19 | 0 | 0 | 0 | 1 | 1 | 0 | 0 | 0 | 0 | 0 | 0 | 1 | 0 | 0 | 1 | 1 | 0 | 1 | 2 | 0 | 0 | 1 | 0 | 0 | 0 | 0 | 0 |

Table S3 presents the results of the network analysis of the CSI Nexus Network graph. It provides a list of targets and their corresponding CSI clusters and network centrality measures, including weighted degree, closeness, betweenness, and eigenvector centrality. The targets are described based on their relationship to the CSI focal areas of CC, SFM, and ICT and their interconnections in the network. The centrality measures indicate the importance of each target in the network and their potential impact on sustainability challenges. The table provides valuable information for identifying key targets and areas for intervention to address sustainability challenges and promote sustainable development.

Table S3: Network Centrality Measures of SDTs and the CSI Clusters with Corresponding Descriptions

| SDG Targets (SDTs) and CSI Domains Description                                               | CSI Clusters | Weighted Degree | Closeness Centrality | Betweenness Centrality | Eigenvector Centrality |
|----------------------------------------------------------------------------------------------|--------------|-----------------|----------------------|------------------------|------------------------|
| Target 1.1: Eradicate extreme poverty                                                        | CC+SFM       | 5               | 0.501992             | 0.000053               | 0.100143               |
| Target 1.4: Equal rights to ownership, basic services, technology, and economic resources    | CC+SFM+ICT   | 9               | 0.506024             | 0.000132               | 0.155382               |
| Target 1.5: Build resilience to environmental, economic, and social disasters                | CC+SFM+ICT   | 8               | 0.506024             | 0.000132               | 0.155382               |
| Target 1.B: Pro-poor public spending                                                         | ICT+CC       | 5               | 0.501992             | 0.000014               | 0.116569               |
| Target 2.1: Universal access to safe and nutritious food                                     | CC+SFM       | 5               | 0.501992             | 0.000053               | 0.100143               |
| Target 2.3: Double the productivity and incomes of small-scale food producers                | CC+SFM+ICT   | 8               | 0.506024             | 0.000132               | 0.155382               |
| Target 2.4: Sustainable food production and resilient agricultural practices                 | CC+SFM+ICT   | 6               | 0.506024             | 0.000132               | 0.155382               |
| Target 2.5: Maintain the genetic diversity in food production                                | ICT+CC       | 4               | 0.501992             | 0.000014               | 0.116569               |
| Target 2.A: Invest in rural infrastructure, agricultural research, technology and gene banks | ICT+CC       | 5               | 0.501992             | 0.000014               | 0.116569               |
| Target 2.C: Ensure stable food commodity markets and timely access to information            | ICT+CC       | 4               | 0.501992             | 0.000014               | 0.116569               |
| Target 3.1: Reduce maternal mortality                                                        | ICT+CC       | 4               | 0.501992             | 0.000014               | 0.116569               |
| Target 3.2: End all preventable deaths under 5 years of age                                  | ICT+CC       | 5               | 0.501992             | 0.000014               | 0.116569               |
| Target 3.3: Fight communicable diseases                                                      | CC+SFM+ICT   | 8               | 0.506024             | 0.000132               | 0.155382               |
| Target 3.4: Reduce mortality from non-communicable diseases and promote mental health        | ICT+CC       | 6               | 0.501992             | 0.000014               | 0.116569               |
| Target 3.6: Reduce road injuries and deaths                                                  | ICT+CC       | 3               | 0.501992             | 0.000014               | 0.116569               |

|                                                                                                     |            |    |          |          |          |
|-----------------------------------------------------------------------------------------------------|------------|----|----------|----------|----------|
| Target 3.8: Achieve universal health coverage                                                       | CC+SFM+ICT | 6  | 0.506024 | 0.000132 | 0.155382 |
| Target 3.9: Reduce illnesses and deaths from hazardous chemicals and pollution                      | CC+SFM+ICT | 5  | 0.506024 | 0.000132 | 0.155382 |
| Target 3.A: Implement the WHO framework convention on tobacco control                               | ICT+CC     | 2  | 0.501992 | 0.000014 | 0.116569 |
| Target 3.B: Support research, development and universal access to affordable vaccines and medicines | ICT+CC     | 3  | 0.501992 | 0.000014 | 0.116569 |
| Target 3.C: Increase health financing and support health workforce in developing countries          | ICT+CC     | 2  | 0.501992 | 0.000014 | 0.116569 |
| Target 3.D: Improve early warning systems for global health risks                                   | ICT+CC     | 4  | 0.501992 | 0.000014 | 0.116569 |
| Target 4.1: Free primary and secondary education                                                    | CC+SFM+ICT | 8  | 0.506024 | 0.000132 | 0.155382 |
| Target 4.2: Equal access to quality pre-primary education                                           | ICT+CC     | 6  | 0.501992 | 0.000014 | 0.116569 |
| Target 4.3: Equal access to affordable technical, vocational and higher education                   | CC+SFM+ICT | 5  | 0.506024 | 0.000132 | 0.155382 |
| Target 4.4: Increase the number of people with relevant skills for financial success                | CC+SFM+ICT | 7  | 0.506024 | 0.000132 | 0.155382 |
| Target 4.5: Eliminate all discrimination in education                                               | ICT+CC     | 5  | 0.501992 | 0.000014 | 0.116569 |
| Target 4.7: Education for sustainable development and global citizenship                            | CC+SFM+ICT | 5  | 0.506024 | 0.000132 | 0.155382 |
| Target 4.A: Build and upgrade inclusive and safe schools                                            | ICT+CC     | 4  | 0.501992 | 0.000014 | 0.116569 |
| Target 4.B: Expand higher education scholarships for developing countries                           | ICT+CC     | 3  | 0.501992 | 0.000014 | 0.116569 |
| Target 5.1: End discrimination against women and girls                                              | CC+SFM+ICT | 6  | 0.506024 | 0.000132 | 0.155382 |
| Target 5.2: End all violence against and exploitation of women and girls                            | ICT+CC     | 2  | 0.501992 | 0.000014 | 0.116569 |
| Target 5.3: Eliminate forced marriages and genital mutilation                                       | ICT+CC     | 2  | 0.501992 | 0.000014 | 0.116569 |
| Target 5.4: Value unpaid care and promote shared domestic responsibilities                          | ICT+CC     | 4  | 0.501992 | 0.000014 | 0.116569 |
| Target 5.5: Ensure full participation in leadership and decision-making                             | CC+SFM+ICT | 9  | 0.506024 | 0.000132 | 0.155382 |
| Target 5.A: Equal rights to economic resources, property ownership and financial services           | CC+SFM+ICT | 7  | 0.506024 | 0.000132 | 0.155382 |
| Target 5.B: Promote empowerment of women through technology                                         | CC+SFM+ICT | 9  | 0.506024 | 0.000132 | 0.155382 |
| Target 5.C: Adopt and strengthen policies and enforceable legislation for gender equality           | CC+SFM+ICT | 4  | 0.506024 | 0.000132 | 0.155382 |
| Target 6.3: Improve water quality, wastewater treatment and safe reuse                              | CC+SFM     | 4  | 0.501992 | 0.000053 | 0.100143 |
| Target 6.4: Increase water use efficiency and ensure freshwater supplies                            | CC+SFM     | 6  | 0.501992 | 0.000053 | 0.100143 |
| Target 6.5: Implement integrated water resources management                                         | CC+SFM     | 5  | 0.501992 | 0.000053 | 0.100143 |
| Target 6.6: Protect and restore water-related ecosystems                                            | CC+SFM     | 8  | 0.501992 | 0.000053 | 0.100143 |
| Target 6.A: Expand water and sanitation support to developing countries                             | ICT+CC     | 3  | 0.501992 | 0.000014 | 0.116569 |
| Target 6.B: Support local engagement in water and sanitation management                             | ICT+CC     | 2  | 0.501992 | 0.000014 | 0.116569 |
| Target 7.1: Universal access to modern energy                                                       | CC+SFM+ICT | 9  | 0.506024 | 0.000132 | 0.155382 |
| Target 7.2: Increase global percentage of renewable energy                                          | CC+SFM+ICT | 10 | 0.506024 | 0.000132 | 0.155382 |
| Target 7.3: Double the improvement in energy efficiency                                             | CC+SFM+ICT | 6  | 0.506024 | 0.000132 | 0.155382 |
| Target 7.A: Promote access, technology and investments in clean energy                              | CC+SFM+ICT | 6  | 0.506024 | 0.000132 | 0.155382 |
| Target 7.B: Expand and upgrade energy services for developing countries                             | ICT+CC     | 6  | 0.501992 | 0.000014 | 0.116569 |
| Target 8.1: Sustainable Economic Growth                                                             | ICT+CC     | 6  | 0.501992 | 0.000014 | 0.116569 |
| Target 8.2: Diversify, innovate and upgrade for economic productivity                               | CC+SFM+ICT | 6  | 0.506024 | 0.000132 | 0.155382 |
| Target 8.3: Promote policies to support job creation and growing enterprises                        | CC+SFM+ICT | 10 | 0.506024 | 0.000132 | 0.155382 |
| Target 8.4: Improve resource efficiency in consumption and production                               | CC+SFM     | 6  | 0.501992 | 0.000053 | 0.100143 |
| Target 8.5: Full employment and decent work with equal pay                                          | CC+SFM+ICT | 8  | 0.506024 | 0.000132 | 0.155382 |
| Target 8.7: End modern slavery, trafficking, and child labour                                       | CC+SFM     | 2  | 0.501992 | 0.000053 | 0.100143 |
| Target 8.8: Protect labour rights and promote safe working environments                             | CC+SFM     | 5  | 0.501992 | 0.000053 | 0.100143 |
| Target 8.9: Promote beneficial and sustainable tourism                                              | CC+SFM+ICT | 5  | 0.506024 | 0.000132 | 0.155382 |
| Target 8.10: Universal access to banking, insurance and financial services                          | ICT+CC     | 6  | 0.501992 | 0.000014 | 0.116569 |
| Target 9.1: Develop sustainable, resilient and inclusive infrastructures                            | CC+SFM+ICT | 8  | 0.506024 | 0.000132 | 0.155382 |
| Target 9.2: Promote inclusive and sustainable industrialization                                     | ICT+CC     | 3  | 0.501992 | 0.000014 | 0.116569 |
| Target 9.3: Increase access to financial services and markets                                       | CC+SFM+ICT | 7  | 0.506024 | 0.000132 | 0.155382 |
| Target 9.4: Upgrade all industries and infrastructures for sustainability                           | ICT+CC     | 5  | 0.501992 | 0.000014 | 0.116569 |

|                                                                                                                             |            |   |          |          |          |
|-----------------------------------------------------------------------------------------------------------------------------|------------|---|----------|----------|----------|
| Target 9.5: Enhance research and upgrade industrial technologies                                                            | ICT+CC     | 4 | 0.501992 | 0.000014 | 0.116569 |
| Target 9.A: Facilitate sustainable infrastructure development for developing countries                                      | ICT+CC     | 5 | 0.501992 | 0.000014 | 0.116569 |
| Target 9.B: Support domestic technology development and industrial diversification                                          | ICT+CC     | 3 | 0.501992 | 0.000014 | 0.116569 |
| Target 9.C: Universal access to information and communications technology                                                   | ICT+CC     | 6 | 0.501992 | 0.000014 | 0.116569 |
| Target 10.2: Promote universal social, economic and political inclusion                                                     | ICT+CC     | 5 | 0.501992 | 0.000014 | 0.116569 |
| Target 10.3: Ensure equal opportunities and end discrimination                                                              | ICT+CC     | 4 | 0.501992 | 0.000014 | 0.116569 |
| Target 11.1: Safe and affordable housing                                                                                    | CC+SFM+ICT | 5 | 0.506024 | 0.000132 | 0.155382 |
| Target 11.2: Affordable and sustainable transport systems                                                                   | ICT+CC     | 4 | 0.501992 | 0.000014 | 0.116569 |
| Target 11.3: Inclusive and sustainable urbanization                                                                         | CC+SFM+ICT | 5 | 0.506024 | 0.000132 | 0.155382 |
| Target 11.4: Protect the world's cultural and natural heritage                                                              | CC+SFM+ICT | 6 | 0.506024 | 0.000132 | 0.155382 |
| Target 11.5: Reduce the adverse effects of natural disasters                                                                | ICT+CC     | 5 | 0.501992 | 0.000014 | 0.116569 |
| Target 11.6: Reduce the environmental impacts of cities                                                                     | CC+SFM+ICT | 6 | 0.506024 | 0.000132 | 0.155382 |
| Target 11.7: Provide access to safe and inclusive green and public spaces                                                   | CC+SFM+ICT | 4 | 0.506024 | 0.000132 | 0.155382 |
| Target 11.A: Strong national and regional development planning                                                              | ICT+CC     | 4 | 0.501992 | 0.000014 | 0.116569 |
| Target 11.B: Implement policies for inclusion, resource efficiency and disaster risk reduction                              | ICT+CC     | 4 | 0.501992 | 0.000014 | 0.116569 |
| Target 11.C: Support least developed countries in sustainable and resilient building                                        | ICT+CC     | 3 | 0.501992 | 0.000014 | 0.116569 |
| Target 12.1: Implement the 10-year sustainable consumption and production framework                                         | CC+SFM     | 4 | 0.501992 | 0.000053 | 0.100143 |
| Target 12.2: Sustainable management and use of natural resources                                                            | CC+SFM     | 7 | 0.501992 | 0.000053 | 0.100143 |
| Target 12.3: Halve global per capita food waste                                                                             | CC+SFM     | 4 | 0.501992 | 0.000053 | 0.100143 |
| Target 12.4: Responsible management of chemicals and waste                                                                  | ICT+CC     | 4 | 0.501992 | 0.000014 | 0.116569 |
| Target 12.5: Substantially reduce waste generation                                                                          | CC+SFM+ICT | 8 | 0.506024 | 0.000132 | 0.155382 |
| Target 12.6: Encourage companies to adopt sustainable practices and sustainability reporting                                | CC+SFM+ICT | 6 | 0.506024 | 0.000132 | 0.155382 |
| Target 12.7: Promote sustainable public procurement practices                                                               | CC+SFM+ICT | 6 | 0.506024 | 0.000132 | 0.155382 |
| Target 12.8: Promote universal understanding of sustainable lifestyles                                                      | CC+SFM+ICT | 6 | 0.506024 | 0.000132 | 0.155382 |
| Target 12.A: Support developing countries' scientific and technological capacity for sustainable consumption and production | CC+SFM+ICT | 5 | 0.506024 | 0.000132 | 0.155382 |
| Target 12.B: Develop and implement tools to monitor sustainable tourism                                                     | ICT+CC     | 2 | 0.501992 | 0.000014 | 0.116569 |
| Target 13.1: Strengthen resilience and adaptive capacity to climate-related disasters                                       | CC+SFM+ICT | 8 | 0.506024 | 0.000132 | 0.155382 |
| Target 13.2: Integrate climate change measures into policy and planning                                                     | CC+SFM+ICT | 8 | 0.506024 | 0.000132 | 0.155382 |
| Target 13.3: Build knowledge and capacity to meet climate change                                                            | CC+SFM+ICT | 7 | 0.506024 | 0.000132 | 0.155382 |
| Target 13.A: Implement then UN Framework Convention on Climate Change                                                       | CC+SFM     | 5 | 0.501992 | 0.000053 | 0.100143 |
| Target 13.B: Promote mechanisms to raise capacity for planning and management                                               | ICT+CC     | 5 | 0.501992 | 0.000014 | 0.116569 |
| Target 14.1: Reduce marine pollution                                                                                        | CC+SFM     | 5 | 0.501992 | 0.000053 | 0.100143 |
| Target 14.A: Increase scientific knowledge, research and technology for ocean health                                        | ICT+CC     | 3 | 0.501992 | 0.000014 | 0.116569 |
| Target 15.1: Conserve and restore terrestrial and freshwater ecosystems                                                     | CC+SFM+ICT | 9 | 0.506024 | 0.000132 | 0.155382 |
| Target 15.2: End deforestation and restore degraded forests                                                                 | CC+SFM+ICT | 9 | 0.506024 | 0.000132 | 0.155382 |
| Target 15.3: End desertification and restore degraded land                                                                  | CC+SFM+ICT | 9 | 0.506024 | 0.000132 | 0.155382 |
| Target 15.4: Ensure conservation of mountain ecosystems                                                                     | CC+SFM+ICT | 8 | 0.506024 | 0.000132 | 0.155382 |
| Target 15.5: Protect biodiversity and natural habitats                                                                      | CC+SFM+ICT | 9 | 0.506024 | 0.000132 | 0.155382 |
| Target 15.6: Protect access to genetic resources and fair sharing of the benefits                                           | ICT+CC     | 3 | 0.501992 | 0.000014 | 0.116569 |
| Target 15.7: Eliminate poaching and trafficking of protected species                                                        | SFM+ICT    | 3 | 0.501992 | 0.000065 | 0.094052 |
| Target 15.8: Prevent invasive alien species on land and in water ecosystems                                                 | CC+SFM+ICT | 4 | 0.506024 | 0.000132 | 0.155382 |
| Target 15.9: Integrate ecosystem and biodiversity in governmental planning                                                  | ICT+CC     | 4 | 0.501992 | 0.000014 | 0.116569 |
| Target 15.A: Increase financial resources to conserve and sustainably use ecosystem and biodiversity                        | CC+SFM+ICT | 3 | 0.506024 | 0.000132 | 0.155382 |
| Target 15.B: Finance and incentivize sustainable forest management                                                          | CC+SFM+ICT | 5 | 0.506024 | 0.000132 | 0.155382 |
| Target 15.C: Combat global poaching and trafficking                                                                         | CC+SFM+ICT | 4 | 0.506024 | 0.000132 | 0.155382 |
| Target 16.3: Promote the rule of law and ensure equal access to justice                                                     | CC+SFM+ICT | 3 | 0.506024 | 0.000132 | 0.155382 |

|                                                                                                       |            |     |          |          |          |
|-------------------------------------------------------------------------------------------------------|------------|-----|----------|----------|----------|
| Target 16.4: Combat organized crime and illicit financial and arms flows                              | CC+SFM     | 2   | 0.501992 | 0.000053 | 0.100143 |
| Target 16.5: Substantially reduce corruption and bribery                                              | CC+SFM+ICT | 4   | 0.506024 | 0.000132 | 0.155382 |
| Target 16.6: Develop effective, accountable and transparent institutions                              | CC+SFM+ICT | 6   | 0.506024 | 0.000132 | 0.155382 |
| Target 16.7: Ensure responsive, inclusive and representative decision-making                          | CC+SFM+ICT | 7   | 0.506024 | 0.000132 | 0.155382 |
| Target 16.10: Ensure public access to information and protect fundamental freedoms                    | ICT+CC     | 3   | 0.501992 | 0.000014 | 0.116569 |
| Target 16.A: Strengthen national institutions to prevent violence and combat crime and terrorism      | ICT+CC     | 2   | 0.501992 | 0.000014 | 0.116569 |
| Target 16.B: Promote and enforce non-discriminatory laws and policies                                 | ICT+CC     | 2   | 0.501992 | 0.000014 | 0.116569 |
| Target 17.1: Mobilize resources to improve domestic revenue collection                                | CC+SFM     | 3   | 0.501992 | 0.000053 | 0.100143 |
| Target 17.6: Knowledge sharing and cooperation for access to science, technology, and innovation      | ICT+CC     | 5   | 0.501992 | 0.000014 | 0.116569 |
| Target 17.8: Strengthen the science, technology, and innovation capacity of least-developed countries | ICT+CC     | 4   | 0.501992 | 0.000014 | 0.116569 |
| Target 17.9: Enhanced SDG capacity in developing countries                                            | CC+SFM+ICT | 3   | 0.506024 | 0.000132 | 0.155382 |
| Target 17.11: Increase the exports of developing countries                                            | CC+SFM+ICT | 3   | 0.506024 | 0.000132 | 0.155382 |
| Target 17.14: Enhance policy coherence for sustainable development                                    | CC+SFM+ICT | 5   | 0.506024 | 0.000132 | 0.155382 |
| Target 17.16: Enhance the global partnership for sustainable development                              | ICT+CC     | 2   | 0.501992 | 0.000014 | 0.116569 |
| Target 17.17: Encourage effective partnerships                                                        | CC+SFM+ICT | 5   | 0.506024 | 0.000132 | 0.155382 |
| Target 17.18: Enhance the availability of reliable data                                               | ICT+CC     | 3   | 0.501992 | 0.000014 | 0.116569 |
| Target 17.19: Further develop measurements of progress                                                | ICT+CC     | 2   | 0.501992 | 0.000014 | 0.116569 |
| Climate Change (CC)                                                                                   | CC-H       | 328 | 0.969231 | 0.500538 | 1.000000 |
| Sustainable Forest Management (SFM)                                                                   | SFM-H      | 128 | 0.547826 | 0.136038 | 0.636635 |
| Information and Communication Technology (ICT)                                                        | ICT-H      | 179 | 0.787500 | 0.340440 | 0.904838 |

Figure S1a presents a network visualization connecting CC1 to CC4, SFM1 to SFM4, ICT1 to ICT4, and the SDTs into one network system. The study created a dataset using all SDTs aligned to CC, SFM, and ICT, identified from 12 relevant pieces of literature, and conducted social network analysis using Gephi, resulting in an undirected graph with 181 nodes 733 edges. The nodes were color-coded by CSI cluster, with each domain having four sub-nodes labeled CC1 to CC4, SFM1 to SFM4, and ICT1 to ICT4. The network's statistics showed an average weighted degree of 8.099, a network diameter of 4, and a graph density of 0.045. The hubs of each domain were depicted in darker colors of blue, green, and orange. The visualization helps identify the interconnections between nodes and clusters, and the thicker lines between nodes indicate more linked edges.



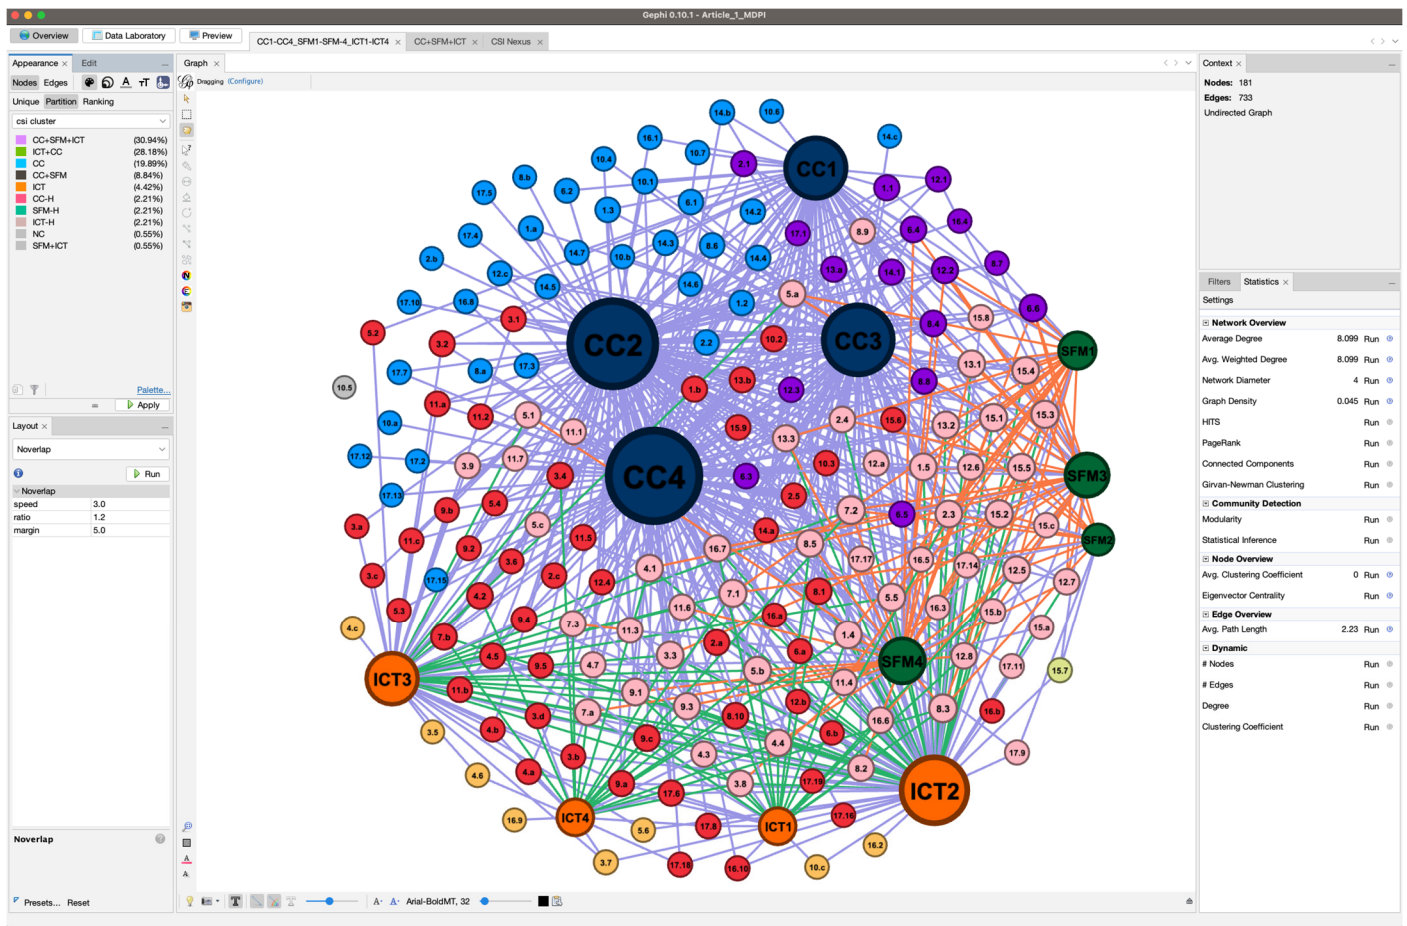

Figure S1a. complex network visualization based on twelve data sources (CC1 to CC4, SFM1 to SFM4, and ICT1 to ICT4)

Figure S1b is a simplified version of Figure 3a, consolidating the CC, SFM, and ICT hubs into three network hubs. The resulting undirected graph has 155 nodes and 332 edges. The average weighted degree is 8.573, indicating that each node is connected to an average of 8.573 other nodes. The graph's diameter is 4, and the density is 0.028. The modularity value is 0.0, indicating no clear community structure, and the statistical inference value is 659.536. The network visualization color-codes nodes are based on CSI clusters, with CC in blue, ICT in orange, CC+SFM in purple, SFM+ICT in yellow, ICT+CC in red, and CC+SFM+ICT in pink. The hubs are represented with darker shades of blue, green, and orange; thicker lines indicate more connected edges. Overall, the simplified network graph provides insights into the interconnectivity between the three network hubs and their characteristics, which can aid in interpreting the network and identifying key connections.

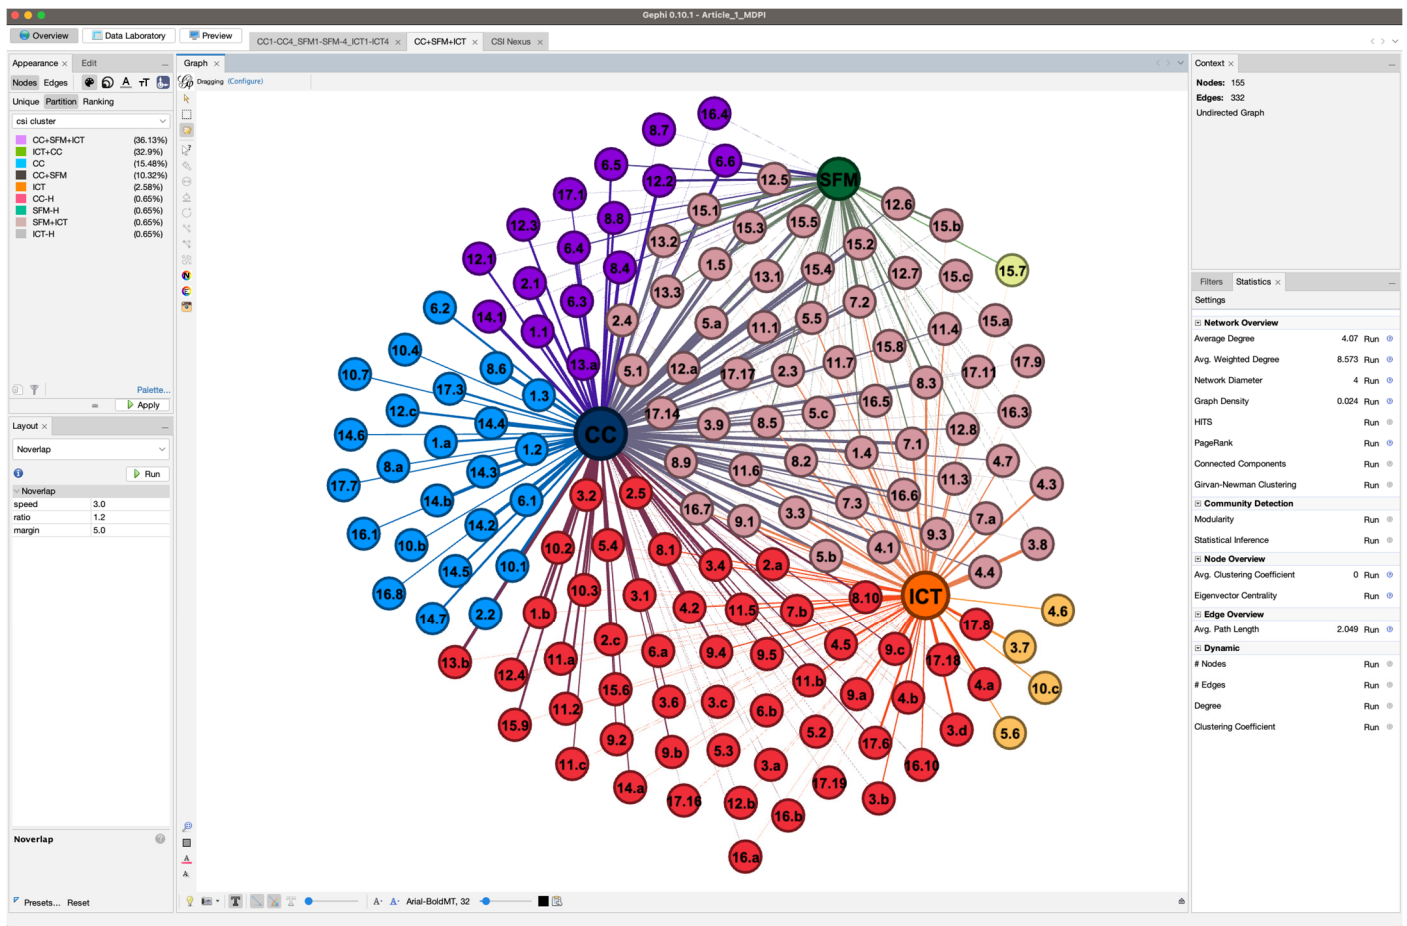

Figure S1b. The simplified network of CC, SFM, and ICT Combines CC1 to CC4 into CC, SFM1 to SFM4 into SFM, and ICT1 to ICT4 into ICT only.

The outcome of the CSI Nexus and SDTs Integration is presented in Figure S1c, showing a streamlined and focused network structure. The network has 127 nodes and 304 edges, with a high average weighted degree of 10, indicating highly connected nodes, and a small network diameter of 3, suggesting closely clustered nodes. The low graph density of 0.024 means few edges compared to the total possible edges. The modularity of 0.173 shows some organization into distinct communities. The nodes are color-coded based on the CSI clusters and hub nodes identified by the analysis. The larger node size for CC reflects its central role in the network. The thicker lines connecting nodes with more connected edges demonstrate the strength of their relationships within the network. The network visualization helps interpret the overall structure of the network and identifies the different hubs and their connections, providing a valuable tool for understanding and addressing sustainability challenges.

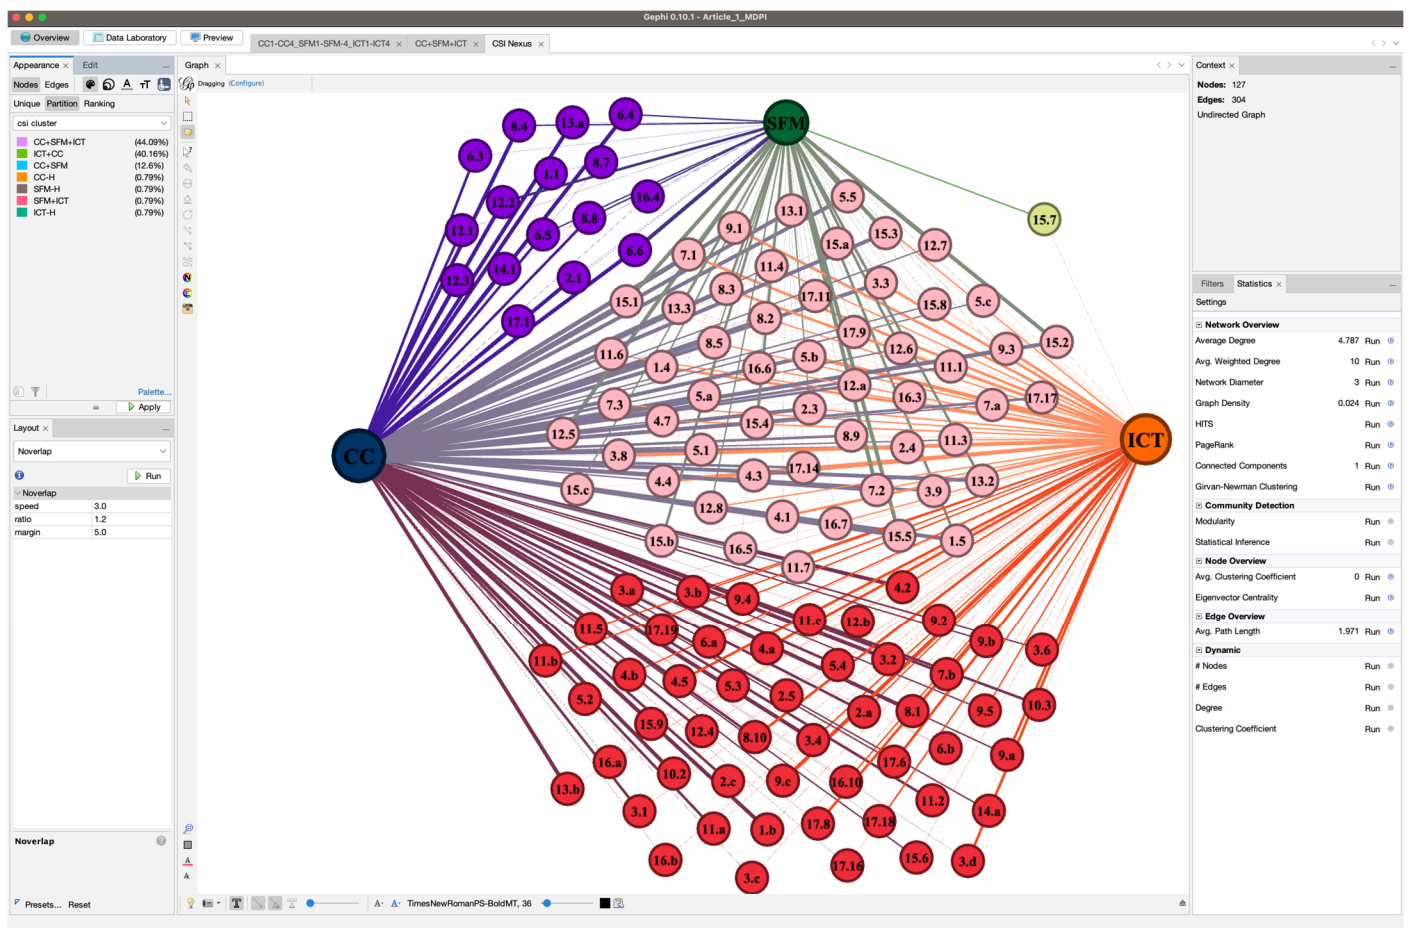

Figure S1c. The CCC, SFM, and ICT Domains and the 124 SDTs interconnected to form the CSI Nexus and SDTs Integration
